# Supplementary material for: Techno-economic analysis and life-cycle assessment of the electrochemical conversion process with captured CO2 in an amine-based solvent
Source: Royal Society of Chemistry journal article supplement (doi:10.1039/d3gc02329j), 2023-01-01
Supplement: d3gc02329j1.pdf [file d3gc02329j1.pdf]

## Supporting Information

# Techno-economic analysis and life-cycle assessment of the electrochemical conversion process with captured CO<sub>2</sub> in amine-based solvent

Suhyun Lee,<sup>‡ab</sup> Woong Choi,<sup>‡cd</sup> Jae Hyung Kim,<sup>e</sup> Sohyeon Park,<sup>a</sup> Yun Jeong Hwang,<sup>\*fg</sup>

Jonggeol Na<sup>\*ab</sup>

<sup>a</sup>Department of Chemical Engineering and Materials Science, Ewha Womans University, Seoul 03760, Republic of Korea

<sup>b</sup>Graduate Program in System Health Science and Engineering, Ewha Womans University, Seoul 03760, Republic of Korea

<sup>c</sup>Energy Storage and Distributed Resources Division, Lawrence Berkeley National Laboratory, Berkeley, California 94720, USA

<sup>d</sup>Clean Energy Research Center, Korea Institute of Science and Technology (KIST), Seoul 02792, Republic of Korea

<sup>e</sup>Clean Fuel Research Laboratory, Korea Institute of Energy Research, 152 Gajeong-ro, Yuseong-gu, Daejeon 34129, Republic of Korea.

<sup>f</sup>Department of Chemistry, Seoul National University, Seoul 08826, Republic of Korea

<sup>g</sup>Center for Nanoparticle Research, Institute for Basic Science (IBS), Seoul 08826, Republic of Korea

<sup>‡</sup>These authors contributed equally to this work.

**Correspondence and requests for materials should be addressed to**

Y.J.H. (email: yjhwang1@snu.ac.kr) or J.N. (email: jgna@ewha.ac.kr).

## Supplementary Notes

### N1. Technoeconomic assumptions

CO<sub>2</sub> capture plants are mainly built for gas-fired power plants and coal-fired power plants. Therefore, we considered the power plant to be included in the economic evaluation boundary for a more reasonable evaluation. And the reference process is a subcritical pulverized coal-fired power plant (Ppc = 550 MW) as reported in a 2010 report by the US Department of Energy (Table S1) [1]. Although a CCS process that consumes less energy has been reported [2] than the corresponding NETL data, USDOE's 2010 report contains detailed information on the carbon capture process, and the information was cited in this paper because it is classic information.

### N2. Calculation of electrolyzer capital cost

The electrolyzer cost estimation method is based on the DOE Future central H<sub>2</sub>A base case for an alkaline electrolyzer (ver.2019) data [3]. Based on the data, uninstalled capital costs attributed to the stack component were set at \$233 kW<sup>-1</sup>, typical operating conditions of electrolyzer were set at 3 A cm<sup>-2</sup> and 1.8 V, and the installation factor was set at 1.2. The installed cost calculated based on that data is \$15,098 m<sup>-2</sup>. In addition, the maintenance cost is 2.5% of the annual capital investment, and the balance of plant (BoP) cost is assumed to be 35% of the electrolyzer cell system cost.

The area of the electrolyzer was calculated by dividing the amount of current by the current density after calculating the required amount of current using the number of electrons required for the reaction. The installed cost of the electrolyzer in this process was calculated by multiplying the obtained area of the electrolyzer with the installed cost per area of the electrolyzer calculated using the DOE H<sub>2</sub>A PEM electrolysis cell data [3]. The calculation results are tabulated in Table S19 and S20.

Calculation of required partial current (A) :

$$3238168 \frac{kg}{day} \times \frac{day}{86400s} \times 1000 \frac{g}{kg} \times \frac{mol}{28.01g} \times 2 e^{-} \times 96480 \frac{C}{mol} = 258190273 A$$

Calculation of required total current (A):

$$\frac{Required\ partial\ current\ (A)}{Faradaic\ efficiency} = \frac{258190273 A}{0.99} = 260798256 A$$

Calculation of required electrolyzer area (m<sup>2</sup>)

$$\frac{\text{Required total current (A)}}{\text{Current density} \left( \frac{\text{A}}{\text{cm}^2} \right) \times \frac{10^4 \text{ cm}^2}{\text{m}^2}} = \frac{260798256 \text{ A}}{0.2} = 130399 \text{ m}^2$$

Calculation of required power (MW):

$$\begin{aligned} \text{Required total current (A)} \times \text{cell voltage (V)} &= 260798256 \times 2.29 \times 10^{-6} \\ &= 597 \text{ MW} \end{aligned}$$

Calculated electrolyzer cost (\$)

$$\begin{aligned} \text{Required electrolyzer area (m}^2\text{)} \times \text{Reference PEM electrolyzer purchase cost} \left( \frac{\$}{\text{m}^2} \right) \\ = 130399 \times 12582 = 1,640,681,832 \end{aligned}$$

### N3. Property parameters

1) Pure component properties - Temperature dependent correlation parameters (Table S6-S13)

- Aqueous infinite dilution heat capacity (Parameter: CPAQ0) [4]

$$C_{p,i}^{\infty, aq} \left( \frac{\text{J}}{\text{kmol} \cdot \text{K}} \right) = C_1 + C_2 T(\text{K}) + C_3 (T(\text{K}))^2 + \frac{C_{4i}}{T(\text{K})} + \frac{C_{5i}}{T(\text{K})^2} + \frac{C_{6i}}{\sqrt{T(\text{K})}}$$

$$\text{for } C_{7i} \leq T \leq C_{8i}$$

- Pure component dielectric constant coefficients of nonaqueous solvents (CPDIEC) [5]

$$\varepsilon_i(T) = A_i + B_i \left( \frac{1}{T} - \frac{1}{C_i} \right)$$

- Ideal gas heat capacity (CPIG) [4]

$$C_p^{*, ig} = C_{1i} + C_{2i} T + C_{3i} T^2 + C_{4i} T^3 + C_{5i} T^4 + C_{6i} T^5 \text{ for } C_{7i} \leq T \leq C_{8i}$$

$$C_p^{*, ig} = C_{9i} + C_{10i} T^{C_{11i}} \text{ for } T < C_{7i}$$

- Coefficients for the Jones-Dole correction to liquid mixture viscosity due to the presence of electrolytes (moles) (IONMOB) [4]

$$\Delta \eta_{ca}^l = A_{ca} \sqrt{C_{ca}^a} + B_{ca} \sqrt{C_{ca}^a}$$

- Coefficients for the Jones-Dole correction to liquid mixture viscosity due to the presence of electrolytes (volume/mole) (IONMUB) [4]

$$\Delta\eta_{ca}^l = A_{ca}\sqrt{C_{ca}^a} + B_{ca}\sqrt{C_{ca}^a}$$

- Coefficients for the extended antoine vapor pressure equation for a liquid (PLXANT) [6]

$$\ln p_i^{*,l} = C_{1i} + \frac{C_{2i}}{T + C_{3i}} + C_{4i}T + C_{5i}\ln T + C_{6i}T^{C_{7i}} \text{ for } C_{8i} \leq T \leq C_{9i}$$

- Brelvi-O-connell volume parameter (VLBROC) [4]

$$V_{iA}^\infty = fcn(V_i^{BO}, V_A^{BO}, V_A^{*l})$$

2) Temperature dependent binary interaction parameters (Table S14-S18)

- Henry's constant (HENRY) [4, 7]

$$\ln(H_i/\gamma_i^\infty) = \sum_A \omega_A \ln(H_{iA}/\gamma_{iA}^\infty)$$

- Non-random two-liquid (NRTL) [5, 7]

$$\ln \gamma_i = \frac{\sum_j x_j \tau_{ji} G_{ji}}{\sum_k x_k G_{ki}} + \sum_j \frac{x_j G_{ij}}{\sum_k x_k G_{kj}} \left( \tau_{ij} - \frac{\sum_m x_m \tau_{mj} G_{mj}}{\sum_k x_k G_{kj}} \right)$$

- Liquid mixture viscosity (MUKIJ, MULIJ) [4]

$$\ln \eta^l = \sum_{i=1}^n X_i \ln \eta^{*,l} + \sum_{i=1}^n \sum_{j>i}^n k_{ij} X_i X_j \ln \eta_{ij} + \sum_{i=1}^n X_i \left[ \sum_{j \neq i}^n X_j (l_{ij} \ln \eta_{ij})^{1/3} \right]^3$$

- Clarke aqueous electrolyte volume (VLCLK) [4]

$$V_{ca} = V_{ca}^\infty + A_{ca} \frac{\sqrt{x_{solute}}}{1 + \sqrt{x_{solute}}}$$

## N4. Technoeconomic analysis result

Techno-economic evaluation using the results obtained through each cCO<sub>2</sub>RR and CO<sub>2</sub>RR process simulation under the current and optimistic condition are as follows. The underlying framework was referenced in NETL Cost Estimation Methods [1, 8].

### - Total plant cost details

#### 1) cCO<sub>2</sub>RR (Current)

| <b>Capital Cost Details</b>                      |                     |                    |                    |                     |                      |                    |                    |                              |
|--------------------------------------------------|---------------------|--------------------|--------------------|---------------------|----------------------|--------------------|--------------------|------------------------------|
| Item/Description                                 | Bare Erected Cost   |                    |                    |                     | Eng'g CM<br>H.O.&Fee | Contingencies      |                    | TOTAL PLANT COST<br>(\$1000) |
|                                                  | Equipment Cost      | Material Cost      | Labor              | Total               |                      | Process            | Project            |                              |
| cCO <sub>2</sub> RR process                      | \$19,780,456        | \$1,331,205        | \$846,360          | \$21,958,021        | \$2,099,187          | \$8,783,208        | \$5,687,127        | \$38,527,544                 |
| SUBTOTAL                                         |                     |                    |                    |                     |                      |                    |                    |                              |
| <b>TOTAL COST with POWER PLANT COST</b>          | <b>\$20,347,864</b> | <b>\$1,392,228</b> | <b>\$1,182,897</b> | <b>\$22,922,990</b> | <b>\$2,189,890</b>   | <b>\$8,783,208</b> | <b>\$5,820,411</b> | <b>\$39,716,498</b>          |
| <b>Owner's Cost</b>                              |                     |                    |                    |                     |                      |                    |                    |                              |
| <b>Preproduction Costs</b>                       |                     |                    |                    |                     |                      |                    |                    |                              |
| 6 Months All Labor                               |                     |                    |                    |                     |                      |                    |                    | \$3,634                      |
| 1 Month Maintenance Materials                    |                     |                    |                    |                     |                      |                    |                    | \$32,498                     |
| 1 Month Non-fuel Consumables                     |                     |                    |                    |                     |                      |                    |                    | \$225,315                    |
| 25% of 1 Months Fuel Cost at 100% CF             |                     |                    |                    |                     |                      |                    |                    | \$1,524                      |
| 2% TPC                                           |                     |                    |                    |                     |                      |                    |                    | \$794,330                    |
| <b>Total</b>                                     |                     |                    |                    |                     |                      |                    |                    | <b>\$1,057,300</b>           |
| <b>Inventory Capital</b>                         |                     |                    |                    |                     |                      |                    |                    |                              |
| 60 day supply of fuel and consumables at 100% CF |                     |                    |                    |                     |                      |                    |                    | \$542,342                    |
| 0.5% of TPC (space parts)                        |                     |                    |                    |                     |                      |                    |                    | \$198,582                    |
| <b>Total</b>                                     |                     |                    |                    |                     |                      |                    |                    | <b>\$740,925</b>             |
| Initial Cost for Catalyst and Chemicals          |                     |                    |                    |                     |                      |                    |                    | \$6,582                      |
| Land                                             |                     |                    |                    |                     |                      |                    |                    | \$900                        |
| Other Owner's Costs                              |                     |                    |                    |                     |                      |                    |                    | \$5,957,475                  |
| Financing Costs                                  |                     |                    |                    |                     |                      |                    |                    | \$1,072,345                  |
| <b>Total Overnight Cost(TOC)</b>                 |                     |                    |                    |                     |                      |                    |                    | <b>\$48,552,024</b>          |
| TASC Multiplier                                  |                     |                    |                    |                     |                      |                    |                    | 1.14                         |
| <b>Total As-Spent Cost(TASC)</b>                 |                     |                    |                    |                     |                      |                    |                    | <b>\$55,349,307</b>          |

#### 2) cCO<sub>2</sub>RR (Optimistic)

| <b>Capital Cost Details</b>                      |                    |                  |                  |                    |                      |                    |                    |                              |
|--------------------------------------------------|--------------------|------------------|------------------|--------------------|----------------------|--------------------|--------------------|------------------------------|
| Item/Description                                 | Bare Erected Cost  |                  |                  |                    | Eng'g CM<br>H.O.&Fee | Contingencies      |                    | TOTAL PLANT COST<br>(\$1000) |
|                                                  | Equipment Cost     | Material Cost    | Labor            | Total              |                      | Process            | Project            |                              |
| cCO <sub>2</sub> RR process                      | \$4,268,911        | \$376,178        | \$241,440        | \$4,886,528        | \$467,152            | \$1,954,611        | \$1,265,611        | \$8,573,903                  |
| SUBTOTAL                                         |                    |                  |                  |                    |                      |                    |                    |                              |
| <b>TOTAL COST with POWER PLANT COST</b>          | <b>\$4,836,320</b> | <b>\$437,201</b> | <b>\$577,977</b> | <b>\$5,851,497</b> | <b>\$557,855</b>     | <b>\$1,954,611</b> | <b>\$1,398,894</b> | <b>\$9,762,856</b>           |
| <b>Owner's Cost</b>                              |                    |                  |                  |                    |                      |                    |                    |                              |
| <b>Preproduction Costs</b>                       |                    |                  |                  |                    |                      |                    |                    |                              |
| 6 Months All Labor                               |                    |                  |                  |                    |                      |                    |                    | \$3,630                      |
| 1 Month Maintenance Materials                    |                    |                  |                  |                    |                      |                    |                    | \$7,988                      |
| 1 Month Non-fuel Consumables                     |                    |                  |                  |                    |                      |                    |                    | \$85,943                     |
| 25% of 1 Months Fuel Cost at 100% CF             |                    |                  |                  |                    |                      |                    |                    | \$1,524                      |
| 2% TPC                                           |                    |                  |                  |                    |                      |                    |                    | \$195,257                    |
| <b>Total</b>                                     |                    |                  |                  |                    |                      |                    |                    | <b>\$294,342</b>             |
| <b>Inventory Capital</b>                         |                    |                  |                  |                    |                      |                    |                    |                              |
| 60 day supply of fuel and consumables at 100% CF |                    |                  |                  |                    |                      |                    |                    | \$214,407                    |
| 0.5% of TPC (space parts)                        |                    |                  |                  |                    |                      |                    |                    | \$48,814                     |
| <b>Total</b>                                     |                    |                  |                  |                    |                      |                    |                    | <b>\$263,221</b>             |
| Initial Cost for Catalyst and Chemicals          |                    |                  |                  |                    |                      |                    |                    | \$6,577                      |
| Land                                             |                    |                  |                  |                    |                      |                    |                    | \$900                        |
| Other Owner's Costs                              |                    |                  |                  |                    |                      |                    |                    | \$1,464,428                  |
| Financing Costs                                  |                    |                  |                  |                    |                      |                    |                    | \$263,597                    |
| <b>Total Overnight Cost(TOC)</b>                 |                    |                  |                  |                    |                      |                    |                    | <b>\$12,055,922</b>          |
| TASC Multiplier                                  |                    |                  |                  |                    |                      |                    |                    | 1.14                         |
| <b>Total As-Spent Cost(TASC)</b>                 |                    |                  |                  |                    |                      |                    |                    | <b>\$13,743,751</b>          |

3) CO<sub>2</sub>RR (Current)

| <b>Capital Cost Details</b> |                                                  |                    |                  |                  |                      |                  |                    |                              |                     |
|-----------------------------|--------------------------------------------------|--------------------|------------------|------------------|----------------------|------------------|--------------------|------------------------------|---------------------|
| Acct No.                    | Item/Description                                 | Bare Erected Cost  |                  |                  | Eng'g CM<br>H.O.&Fee | Contingencies    |                    | TOTAL PLANT COST<br>(\$1000) |                     |
|                             |                                                  | Equipment Cost     | Material Cost    | Labor            |                      | Total            | Process            |                              | Project             |
| 1                           | CO <sub>2</sub> Capture System                   | \$155,219          | \$95,528         | \$64,060         | \$314,807            | \$30,096         | \$62,961           | \$81,535                     | \$489,399           |
| 2                           | CO <sub>2</sub> Utilization System               | \$4,148,794        | \$304,152        | \$193,152        | \$4,646,098          | \$444,167        | \$1,858,439        | \$1,203,339                  | \$8,152,044         |
|                             | SUBTOTAL                                         | \$4,304,013        | \$399,679        | \$257,213        | \$4,960,905          | \$474,263        | \$1,921,401        | \$1,284,874                  | \$8,641,442         |
|                             | <b>TOTAL COST with POWER PLANT COST</b>          | <b>\$4,871,422</b> | <b>\$460,702</b> | <b>\$593,750</b> | <b>\$5,925,874</b>   | <b>\$564,966</b> | <b>\$1,921,401</b> | <b>\$1,418,158</b>           | <b>\$9,830,396</b>  |
|                             | <b>Owner's Cost</b>                              |                    |                  |                  |                      |                  |                    |                              |                     |
|                             | <b>Preproduction Costs</b>                       |                    |                  |                  |                      |                  |                    |                              |                     |
|                             | 6 Months All Labor                               |                    |                  |                  |                      |                  |                    |                              | \$3,521             |
|                             | 1 Month Maintenance Materials                    |                    |                  |                  |                      |                  |                    |                              | \$8,044             |
|                             | 1 Month Non-fuel Consumables                     |                    |                  |                  |                      |                  |                    |                              | \$98,809            |
|                             | 25% of 1 Months Fuel Cost at 100% CF             |                    |                  |                  |                      |                  |                    |                              | \$1,524             |
|                             | 2% TPC                                           |                    |                  |                  |                      |                  |                    |                              | \$196,608           |
|                             | <b>Total</b>                                     |                    |                  |                  |                      |                  |                    |                              | <b>\$308,505</b>    |
|                             | <b>Inventory Capital</b>                         |                    |                  |                  |                      |                  |                    |                              |                     |
|                             | 60 day supply of fuel and consumables at 100% CF |                    |                  |                  |                      |                  |                    |                              | \$244,680           |
|                             | 0.5% of TPC (space parts)                        |                    |                  |                  |                      |                  |                    |                              | \$49,152            |
|                             | <b>Total</b>                                     |                    |                  |                  |                      |                  |                    |                              | <b>\$293,832</b>    |
|                             | Initial Cost for Catalyst and Chemicals          |                    |                  |                  |                      |                  |                    |                              | \$4,431             |
|                             | Land                                             |                    |                  |                  |                      |                  |                    |                              | \$900               |
|                             | Other Owner's Costs                              |                    |                  |                  |                      |                  |                    |                              | \$1,474,559         |
|                             | Financing Costs                                  |                    |                  |                  |                      |                  |                    |                              | \$265,421           |
|                             | <b>Total Overnight Cost(TOC)</b>                 |                    |                  |                  |                      |                  |                    |                              | <b>\$12,178,045</b> |
|                             | TASC Multiplier                                  |                    |                  |                  |                      |                  |                    |                              | 1.14                |
|                             | <b>Total As-Spent Cost(TASC)</b>                 |                    |                  |                  |                      |                  |                    |                              | <b>\$13,882,971</b> |

- Initial and annual operating and maintenance costs - 1) cCO<sub>2</sub>RR (Current)

| Operating & Maintenance Cost (cCO <sub>2</sub> RR current) |                                   |                       |                |                 |                        |                        |
|------------------------------------------------------------|-----------------------------------|-----------------------|----------------|-----------------|------------------------|------------------------|
| <b>Operating Labor</b>                                     |                                   |                       |                |                 |                        |                        |
| Operating Labor Rate(base):                                |                                   | 34.65 \$/hour         |                |                 |                        |                        |
| Operating Labor Burden:                                    |                                   | 30 % of base          |                |                 |                        |                        |
| Labor O-H Charge Rate:                                     |                                   | 25 % of labor         |                |                 |                        |                        |
|                                                            | Production rate (kg/hr)           | Product Price (\$/kg) | Operating hour | Annual Cost(\$) |                        |                        |
| <b>Sales</b>                                               | CO                                | 270300                | 0.8            | 7446            | \$1,610,123,040        |                        |
|                                                            | Hydrogen                          | 3968                  | 1.39           | 7446            | \$41,072,198           |                        |
|                                                            | 550 MW Electricity                | 550000                | 0.05           | 7446            | \$204,765,000          |                        |
|                                                            |                                   |                       |                |                 | <b>\$1,855,960,238</b> |                        |
| Operating Labor Requirements(O. J.) per shift:             |                                   | 1 unit/mod.           |                |                 |                        |                        |
|                                                            |                                   |                       |                | Total Plant     |                        |                        |
|                                                            | Skilled Operator                  |                       | 2              |                 | 2                      |                        |
|                                                            | Operator                          |                       | 11.3           |                 | 11.3                   |                        |
|                                                            | Foreman                           |                       | 1              |                 | 1                      |                        |
|                                                            | Lab Tech's, etc.                  |                       | 2              |                 | 2                      |                        |
|                                                            | Total-OJ's                        |                       | 16.3           |                 | 16.3                   |                        |
|                                                            |                                   |                       |                |                 | Annual Cost(\$)        |                        |
| Annual Operating Labor Cost                                |                                   |                       |                | \$7,267,195     |                        |                        |
| Maintenance Labor Cost                                     |                                   |                       |                | \$259,984,193   |                        |                        |
| Administrative & Support Labor                             |                                   |                       |                | \$66,812,847    |                        |                        |
| Property Taxes and Insurance                               |                                   |                       |                | \$794,329,950   |                        |                        |
| <b>TOTAL FIXED OPERATING COST</b>                          |                                   |                       |                |                 | <b>\$1,128,394,185</b> |                        |
| <b>VARIABLE OPERATING COST</b>                             |                                   |                       |                |                 |                        |                        |
| <b>Maintenance Material Cost</b>                           |                                   |                       |                |                 |                        | <b>\$389,976,289</b>   |
| <b>Power Plant</b>                                         |                                   |                       |                |                 |                        |                        |
| <b>Consumables</b>                                         |                                   |                       |                |                 |                        |                        |
|                                                            |                                   | Consumption           | Unit Cost      | Initial Fill    |                        |                        |
|                                                            |                                   | Initial Fill          | /Day           |                 | Cost                   |                        |
|                                                            | Water(/1000 gallons)              |                       | 4245.12        | 1.08            | \$/1000 gallons        | \$1,424,619            |
| <b>Chemicals</b>                                           |                                   |                       |                |                 |                        |                        |
|                                                            | MU&WT Chem.(lbs)                  |                       | 20549          | 0.17            | \$/lbs                 | \$1,103,371            |
|                                                            | Limestone(ton)                    |                       | 521            | 21.63           | \$/ton                 | \$3,496,290            |
|                                                            | Ammonia (19% NH3) ton             |                       | 78             | 129.8           | \$/ton                 | \$3,136,289            |
| <b>Subtotal Chemicals</b>                                  |                                   |                       |                |                 | <b>\$0</b>             | <b>\$9,160,569</b>     |
| <b>Direct Reduction Plant</b>                              |                                   |                       |                |                 |                        |                        |
| <b>Utilities</b>                                           |                                   |                       |                |                 |                        |                        |
|                                                            | Electricity (kW)                  |                       | 15             | 0.05            | \$(kW-hr)              | \$5,636                |
|                                                            | Cooling water (m3/hr)             |                       | 32816          | 0.027           | \$/m3                  | \$6,597,347            |
| <b>Chemicals</b>                                           |                                   |                       |                |                 |                        |                        |
|                                                            | Water(/1000 gallons)              | 1132.503              | 535            | 1.08            | \$/1000 gallons        | \$179,143              |
|                                                            | MEA Solvent (ton)                 | 1947.241              | 2.99           | 2249.89         | \$/ton                 | \$4,381,077            |
|                                                            | KCl (kg/hr)                       | 638721.3              | 55.47          | 0.8             | \$/kg                  | \$330,452              |
|                                                            | KOH (kg/hr)                       | 130213.7              | 2562.24        | 0.244           | \$/kg                  | \$4,655,145            |
| <b>Dehydration Process</b>                                 |                                   |                       |                |                 |                        |                        |
|                                                            | Molecular Sieve                   |                       |                |                 |                        | \$1,648,306            |
|                                                            | Operating cost (/yr)              |                       |                |                 |                        | \$487,923              |
| <b>PSA</b>                                                 |                                   |                       |                |                 |                        |                        |
|                                                            | Active Carbon                     |                       |                |                 |                        | \$8,344                |
|                                                            | Electricity (kW)                  |                       | 36448          | 0.05            | \$(kW-hr)              | \$13,569,665           |
|                                                            | Cooling water (m3/hr)             |                       | 1507           | 0.027           | \$/m3                  | \$302,880              |
| <b>Electrolyzer</b>                                        |                                   |                       |                |                 |                        |                        |
|                                                            | Electricity                       |                       | 2753812        | 0.05            | \$(kW-hr)              | \$1,025,244,268        |
|                                                            | Maintenance cost                  |                       |                |                 |                        | \$538,561,337          |
|                                                            | Cell compartment replacement cost |                       |                |                 |                        | \$461,624,003          |
|                                                            | MEA replacement cost              |                       |                |                 |                        | \$247,843,095          |
|                                                            |                                   |                       |                |                 | <b>\$6,581,699</b>     | <b>\$2,301,488,898</b> |
| <b>Others</b>                                              |                                   |                       |                |                 |                        |                        |
|                                                            | SCR Catalyst (m3)                 |                       |                |                 |                        | \$592,641              |
| <b>Waste Disposal</b>                                      |                                   |                       |                |                 |                        |                        |
|                                                            | Fly Ash (ton)                     |                       |                |                 |                        | \$2,049,540            |
|                                                            | Bottom Ash (ton)                  |                       |                |                 |                        | \$512,385              |
| <b>TOTAL VARIABLE OPERATING COST</b>                       |                                   |                       |                |                 | <b>\$6,581,699</b>     | <b>\$2,703,780,322</b> |
|                                                            | Fuel (ton)                        |                       | 5248           | 38.18           | \$/ton                 | \$62,164,371           |

2) cCO<sub>2</sub>RR (Optimistic)

| Operating & Maintenance Cost (CO <sub>2</sub> RR Optimistic) |                                   |                       |                  |                      |                        |                        |
|--------------------------------------------------------------|-----------------------------------|-----------------------|------------------|----------------------|------------------------|------------------------|
| <b>Operating Labor</b>                                       |                                   |                       |                  |                      |                        |                        |
| Operating Labor Rate(base):                                  |                                   | 34.65 \$/hour         |                  |                      |                        |                        |
| Operating Labor Burden:                                      |                                   | 30 % of base          |                  |                      |                        |                        |
| Labor O-H Charge Rate:                                       |                                   | 25 % of labor         |                  |                      |                        |                        |
|                                                              | Production rate (kg/hr)           | Product Price (\$/kg) | Operating hour   | Annual Cost(\$)      |                        |                        |
| <b>Sales</b>                                                 | CO                                | 270300                | 0.8              | 7446                 | \$1,610,123,040        |                        |
|                                                              | Hydrogen                          | 1477                  | 1.39             | 7446                 | \$15,288,275           |                        |
|                                                              | 550 MW Electricity                | 550000                | 0.05             | 7446                 | \$204,765,000          |                        |
|                                                              |                                   |                       |                  |                      | <b>\$1,830,176,315</b> |                        |
| Operating Labor Requirements(O. J.) per shift:               |                                   | 1 unit/mod.           |                  |                      |                        |                        |
|                                                              |                                   |                       |                  | Total Plant          |                        |                        |
|                                                              | Skilled Operator                  |                       | 2                |                      | 2                      |                        |
|                                                              | Operator                          |                       | 11.3             |                      | 11.3                   |                        |
|                                                              | Foreman                           |                       | 1                |                      | 1                      |                        |
|                                                              | Lab Tech's, etc.                  |                       | 2                |                      | 2                      |                        |
|                                                              | Total-O.J.'s                      |                       | 16.3             |                      | 16.3                   |                        |
|                                                              |                                   |                       |                  |                      | Annual Cost(\$)        |                        |
| Annual Operating Labor Cost                                  |                                   |                       |                  | \$7,260,384          |                        |                        |
| Maintenance Labor Cost                                       |                                   |                       |                  | \$63,907,657         |                        |                        |
| Administrative & Support Labor                               |                                   |                       |                  | \$17,792,010         |                        |                        |
| Property Taxes and Insurance                                 |                                   |                       |                  | \$195,257,126        |                        |                        |
| <b>TOTAL FIXED OPERATING COST</b>                            |                                   |                       |                  | <b>\$284,217,177</b> |                        |                        |
| <b>VARIABLE OPERATING COST</b>                               |                                   |                       |                  |                      |                        |                        |
| <b>Maintenance Material Cost</b>                             |                                   |                       |                  |                      |                        | <b>\$95,861,486</b>    |
| <b>Power Plant</b>                                           |                                   |                       |                  |                      |                        |                        |
| <b>Consumables</b>                                           |                                   |                       |                  |                      |                        |                        |
|                                                              |                                   | <b>Consumption</b>    | <b>Unit Cost</b> |                      | <b>Initial Fill</b>    |                        |
|                                                              |                                   | <b>Initial Fill</b>   | <b>/Day</b>      |                      | <b>Cost</b>            |                        |
|                                                              | Water(/1000 gallons)              |                       | 4245.12          | 1.08 \$/1000 gallons |                        | \$1,424,619            |
| <b>Chemicals</b>                                             |                                   |                       |                  |                      |                        |                        |
|                                                              | MU&WT Chem.(lbs)                  |                       | 20549            | 0.17 \$/lbs          |                        | \$1,103,371            |
|                                                              | Limestone(ton)                    |                       | 521              | 21.63 \$/ton         |                        | \$3,496,290            |
|                                                              | Ammonia (19% NH3) ton             |                       | 78               | 129.8 \$/ton         |                        | \$3,136,289            |
|                                                              |                                   |                       |                  |                      | <b>\$0</b>             | <b>\$9,160,569</b>     |
| <b>Direct Reduction Plant</b>                                |                                   |                       |                  |                      |                        |                        |
| <b>Utilities</b>                                             |                                   |                       |                  |                      |                        |                        |
|                                                              | Electricity (kW)                  |                       | 15               | 0.05 \$(/kW-hr)      |                        | \$5,636                |
|                                                              | Cooling water (m3/hr)             |                       | 32905            | 0.027 \$/m3          |                        | \$6,615,290            |
| <b>Chemicals</b>                                             |                                   |                       |                  |                      |                        |                        |
|                                                              | Water(/1000 gallons)              | 1132.496              | 272              | 1.08 \$/1000 gallons | \$1,223                | \$90,982               |
|                                                              | MEA Solvent (ton)                 | 1947.394              | 2.98             | 2249.89 \$/ton       | \$4,381,423            | \$2,079,844            |
|                                                              |                                   |                       |                  |                      |                        |                        |
|                                                              | KCl (kg/hr)                       | 638716.7              | 55.25            | 0.8 \$/kg            | \$510,973              | \$329,137              |
|                                                              | KOH (kg/hr)                       | 108519.7              | 356.23           | 0.244 \$/kg          | \$26,479               | \$647,200              |
| <b>Dehydration Process</b>                                   |                                   |                       |                  |                      |                        |                        |
|                                                              | Molecular Sieve                   |                       |                  |                      | \$1,648,332            |                        |
|                                                              | Operating cost (/yr)              |                       |                  |                      |                        | \$487,946              |
| <b>PSA</b>                                                   |                                   |                       |                  |                      |                        |                        |
|                                                              | Active Carbon                     |                       |                  |                      | \$8,075                |                        |
|                                                              | Electricity (kW)                  |                       | 31585            | 0.05 \$(/kW-hr)      |                        | \$11,759,163           |
|                                                              | Cooling water (m3/hr)             |                       | 1311             | 0.027 \$/m3          |                        | \$263,572              |
| <b>Electrolyzer</b>                                          |                                   |                       |                  |                      |                        |                        |
|                                                              | Electricity                       |                       | 1721272          | 0.05 \$(/kW-hr)      |                        | \$640,829,509          |
|                                                              | Maintenance cost                  |                       |                  |                      |                        | \$112,209,356          |
|                                                              | Cell compartment replacement cost |                       |                  |                      |                        | \$96,179,448           |
|                                                              | MEA replacement cost              |                       |                  |                      |                        | \$51,638,155           |
|                                                              |                                   |                       |                  |                      | <b>\$6,576,505</b>     | <b>\$923,135,238</b>   |
| <b>Others</b>                                                |                                   |                       |                  |                      |                        |                        |
|                                                              | SCR Catalyst (m3)                 |                       |                  |                      |                        | \$592,641              |
| <b>Waste Disposal</b>                                        |                                   |                       |                  |                      |                        |                        |
|                                                              | Fly Ash (ton)                     |                       |                  |                      |                        | \$2,049,540            |
|                                                              | Bottom Ash (ton)                  |                       |                  |                      |                        | \$512,385              |
| <b>TOTAL VARIABLE OPERATING COST</b>                         |                                   |                       |                  |                      | <b>\$6,576,505</b>     | <b>\$1,031,311,859</b> |
|                                                              |                                   |                       |                  | <b>Fuel (ton)</b>    |                        |                        |
|                                                              |                                   | /day                  | 5248             | 38.18 \$/ton         |                        | \$62,164,371           |



3) CO<sub>2</sub>RR

| Operating & Maintenance Cost (CO <sub>2</sub> RR) |                                   |                       |                  |                     |                        |                        |  |
|---------------------------------------------------|-----------------------------------|-----------------------|------------------|---------------------|------------------------|------------------------|--|
| <b>Operating Labor</b>                            |                                   |                       |                  |                     |                        |                        |  |
| Operating Labor Rate(base):                       |                                   | 34.65 \$/hour         |                  |                     |                        |                        |  |
| Operating Labor Burden:                           |                                   | 30 % of base          |                  |                     |                        |                        |  |
| Labor O-H Charge Rate:                            |                                   | 25 % of labor         |                  |                     |                        |                        |  |
|                                                   | Production rate (kg/hr)           | Product Price (\$/kg) | Operating hour   | Annual Cost(\$)     |                        |                        |  |
| <b>Sales</b>                                      | CO                                | 270300                | 0.8              | 7446                | \$1,610,122,294        |                        |  |
|                                                   | Hydrogen                          | 1477                  | 1.39             | 7446                | \$15,283,727           |                        |  |
|                                                   | 550 MW Electricity                | 550000                | 0.05             | 7446                | \$204,765,000          |                        |  |
|                                                   |                                   |                       |                  |                     | <b>\$1,830,171,021</b> |                        |  |
| Operating Labor Requirements(O. J.) per shift:    |                                   | 1 unit/mod.           |                  | Total Plant         |                        |                        |  |
|                                                   | Skilled Operator                  | 2                     |                  | 2                   |                        |                        |  |
|                                                   | Operator                          | 11.3                  |                  | 11.3                |                        |                        |  |
|                                                   | Foreman                           | 1                     |                  | 1                   |                        |                        |  |
|                                                   | Lab Tech's, etc.                  | 2                     |                  | 2                   |                        |                        |  |
|                                                   | Total-O.J.'s                      | 16.3                  |                  | 16.3                |                        |                        |  |
|                                                   |                                   |                       |                  |                     | Annual Cost(\$)        |                        |  |
| Annual Operating Labor Cost                       |                                   |                       |                  |                     | \$7,041,805            |                        |  |
| Maintenance Labor Cost                            |                                   |                       |                  |                     | \$64,349,774           |                        |  |
| Administrative & Support Labor                    |                                   |                       |                  |                     | \$17,847,895           |                        |  |
| Property Taxes and Insurance                      |                                   |                       |                  |                     | \$196,607,926          |                        |  |
| <b>TOTAL FIXED OPERATING COST</b>                 |                                   |                       |                  |                     | <b>\$285,847,400</b>   |                        |  |
| <b>VARIABLE OPERATING COST</b>                    |                                   |                       |                  |                     |                        |                        |  |
| <b>Maintenance Material Cost</b>                  |                                   |                       |                  |                     |                        | <b>\$96,524,661</b>    |  |
| <b>Power Plant</b>                                |                                   |                       |                  |                     |                        |                        |  |
| <b>Consumables</b>                                |                                   |                       |                  |                     |                        |                        |  |
|                                                   |                                   | <b>Consumption</b>    | <b>Unit Cost</b> | <b>Initial Fill</b> |                        |                        |  |
|                                                   |                                   | <b>Initial Fill</b>   | <b>/Day</b>      |                     | <b>Cost</b>            |                        |  |
|                                                   | Water(/1000 gallons)              | 4245.12               | 1.08             | \$/1000 gallons     | \$1,424,619            |                        |  |
| <b>Chemicals</b>                                  |                                   |                       |                  |                     |                        |                        |  |
|                                                   | MU&WT Chem.(lbs)                  | 20549.00              | 0.17             | \$/lbs              | \$1,103,371            |                        |  |
|                                                   | Limestone(ton)                    | 521.00                | 21.63            | \$/ton              | \$3,496,290            |                        |  |
|                                                   | Ammonia (19% NH3) ton             | 77.88                 | 129.8            | \$/ton              | \$3,136,289            |                        |  |
| <b>Subtotal Chemicals</b>                         |                                   |                       |                  |                     | <b>\$0</b>             | <b>\$9,160,569</b>     |  |
| <b>Capture Plant</b>                              |                                   |                       |                  |                     |                        |                        |  |
| <b>Utilities</b>                                  |                                   |                       |                  |                     |                        |                        |  |
|                                                   |                                   | <b>Initial Fill</b>   | <b>/hr</b>       | <b>Unit Cost</b>    |                        |                        |  |
|                                                   | Steam, 450psig (kg/hr)            | 963170                | 0.0176           | \$/kg               | \$126,223,043          |                        |  |
|                                                   | Electricity (kW)                  | 320                   | 0.05             | \$/kW-hr            | \$119,245              |                        |  |
|                                                   | Cooling water (m3/hr)             | 72421                 | 0.027            | \$/m3               | \$14,559,562           |                        |  |
| <b>Utilities</b>                                  |                                   |                       |                  |                     | <b>\$140,901,850</b>   |                        |  |
| <b>Chemicals</b>                                  |                                   |                       |                  |                     |                        |                        |  |
|                                                   |                                   | <b>/Day</b>           |                  |                     |                        |                        |  |
|                                                   | Water(/1000 gallons)              | 1055.457              | 227.05           | \$/1000 gallons     | \$1,140                | \$76,077               |  |
|                                                   | MEA Solvent (ton)                 | 1964.807              | 2.60             | 2249.89             | \$/ton                 | \$4,420,600            |  |
| <b>Chemicals</b>                                  |                                   |                       |                  |                     | <b>\$4,421,740</b>     | <b>\$1,894,059</b>     |  |
| <b>CO<sub>2</sub> Utilize Plant</b>               |                                   |                       |                  |                     |                        |                        |  |
| <b>Utilities</b>                                  |                                   |                       |                  |                     |                        |                        |  |
|                                                   |                                   | <b>Initial Fill</b>   | <b>/hr</b>       | <b>Unit Cost</b>    |                        |                        |  |
|                                                   | Electricity (kW)                  | 31265                 | 0.05             | \$/kW-hr            | \$11,640,012           |                        |  |
|                                                   | Cooling water (m3/hr)             | 5513                  | 0.027            | \$/m3               | \$1,108,263            |                        |  |
| <b>Utilities</b>                                  |                                   |                       |                  |                     | <b>\$12,748,275</b>    |                        |  |
| <b>Chemicals</b>                                  |                                   |                       |                  |                     |                        |                        |  |
|                                                   |                                   | <b>Initial Fill</b>   | <b>/hr</b>       |                     |                        |                        |  |
|                                                   | Water(/1000 gallons)              | 10                    | 1.08             | \$/1000 gallons     | \$76,828               |                        |  |
|                                                   | KOH (kg/hr)                       | 2035.14               | 20.35            | 0.8                 | \$/kg                  | \$1,628                |  |
| <b>Chemicals</b>                                  |                                   |                       |                  |                     | <b>\$1,628</b>         | <b>\$198,057</b>       |  |
| <b>PSA</b>                                        |                                   |                       |                  |                     |                        |                        |  |
|                                                   |                                   |                       | <b>/hr</b>       |                     |                        |                        |  |
|                                                   | Active Carbon                     |                       |                  |                     | \$8,075                |                        |  |
| <b>Capture process</b>                            |                                   |                       |                  |                     |                        |                        |  |
|                                                   | Operating cost (/yr)              |                       |                  |                     |                        | \$21,028,534           |  |
| <b>Electrolyzer</b>                               |                                   |                       |                  |                     |                        |                        |  |
|                                                   | Electricity                       | 1719816               | 0.05             | \$/kW-hr            | \$640,287,452          |                        |  |
|                                                   | Maintenance cost                  |                       |                  |                     |                        | \$112,114,442          |  |
|                                                   | Cell compartment replacement cost |                       |                  |                     |                        | \$96,098,093           |  |
|                                                   | MEA replacement cost              |                       |                  |                     |                        | \$51,594,476           |  |
|                                                   |                                   |                       |                  |                     | <b>\$8,075</b>         | <b>\$921,122,997</b>   |  |
| <b>Others</b>                                     |                                   |                       |                  |                     |                        |                        |  |
|                                                   | SCR Catalyst (m3)                 |                       |                  |                     |                        | \$592,641              |  |
| <b>Waste Disposal</b>                             |                                   |                       |                  |                     |                        |                        |  |
|                                                   | Fly Ash (ton)                     |                       |                  |                     |                        | \$2,049,540            |  |
|                                                   | Bottom Ash (ton)                  |                       |                  |                     |                        | \$512,385              |  |
| <b>TOTAL VARIABLE OPERATING COST</b>              |                                   |                       |                  |                     | <b>\$4,431,443</b>     | <b>\$1,185,705,034</b> |  |
|                                                   |                                   | <b>/day</b>           |                  |                     |                        |                        |  |
| <b>Fuel (ton)</b>                                 |                                   | 5248                  | 38.18            | \$/ton              | <b>\$62,164,371</b>    |                        |  |

## Supplementary Tables

**Table S1.** CO<sub>2</sub> source process technoeconomic assumption parameters [1].

| Parameter                                               | Value             |
|---------------------------------------------------------|-------------------|
| Year of cost data                                       | 2007 <sup>a</sup> |
| Year of publication                                     | 2010              |
| Organization                                            | NETL              |
| Region                                                  | US                |
| Specific fuel type                                      | Bitcoal           |
| Gross plant power (MWe)                                 | 583               |
| Auxiliary load (MWe)                                    | 33                |
| Net plant power (MWe)                                   | 550               |
| Net plant efficiency (HHV,%)                            | 36.8              |
| Net plant heat rate (BTU/kWh)                           | 9,277             |
| CO <sub>2</sub> emissions w/o capture (kg/MWh)          | 856               |
| Capital cost w/o capture (USD/kW)                       | 1,996             |
| Total fixed operating costs w/o capture (\$/kW-net)     | 58.280            |
| Total variable operating costs w/o capture (\$/kWh-net) | 0.00515           |
| Fuel cost (\$/kWh-net)                                  | 0.01518           |
| Cost of CO <sub>2</sub> avoided (USD/tCO <sub>2</sub> ) | 68                |
| Flue gas flowrate (kmol/hr)                             | 79,300            |
| Absorber inlet pressure (bara)                          | 1.2               |
| Absorber inlet temperature (°C)                         | 40                |
| Flue gas composition (mol/mol)                          |                   |
| Ar                                                      | 0.0082            |
| CO <sub>2</sub>                                         | 0.135             |
| H <sub>2</sub> O                                        | 0.1517            |
| N <sub>2</sub>                                          | 0.6808            |
| O <sub>2</sub>                                          | 0.0243            |

<sup>a</sup> The year of cost data in the referenced report is 2007, but the cost analysis in this study is based on 2021. (CEPCI: 2007 (525.4)[9], 2021 (699.97)[10])

**Table S2.** Summary of constants for power law expressions [11].

| Related species | Reaction direction | Reaction kinetics <sup>a</sup>                                                                                                                              |
|-----------------|--------------------|-------------------------------------------------------------------------------------------------------------------------------------------------------------|
| $HCO_3^-$       | Forward            | $r_{10} = 1.33 \times 10^{17} \exp\left(-\frac{55.38}{R} \left[\frac{1}{T} - \frac{1}{298.15}\right]\right) a_{CO_2} a_{OH^-}$                              |
| $HCO_3^-$       | Reverse            | $r_{11} = 6.63 \times 10^{16} \exp\left(-\frac{107.24}{R} \left[\frac{1}{T} - \frac{1}{298.15}\right]\right) a_{HCO_3^-}$                                   |
| $MEACOO^-$      | Forward            | $r_{12} = 3.02 \times 10^{14} \exp\left(-\frac{41.20}{R} \left[\frac{1}{T} - \frac{1}{298.15}\right]\right) a_{MEA} a_{CO_2}$                               |
| $MEACOO^-$      | Reverse (absorber) | $r_{13} = 5.52 \times 10^{23} \exp\left(-\frac{69.05}{R} \left[\frac{1}{T} - \frac{1}{298.15}\right]\right) \frac{a_{MEACOO^-} - a_{H_3O^+}}{a_{MEACOO^-}}$ |
| $MEACOO^-$      | Reverse (stripper) | $r_{13} = 6.56 \times 10^{27} \exp\left(-\frac{95.24}{R} \left[\frac{1}{T} - \frac{1}{298.15}\right]\right) \frac{a_{MEACOO^-} - a_{H_3O^+}}{a_{H_3O^+}}$   |

<sup>a</sup> Reaction rate and pre-exponential factor ( $kmol/m^3 \cdot s$ ), Activation energy (kJ/mol)

**Table S3.** Summary of main specifications for CO<sub>2</sub>RR process.

| <b>CO<sub>2</sub>RR</b>                |                      |                             |                      |
|----------------------------------------|----------------------|-----------------------------|----------------------|
| CO <sub>2</sub> capture rate (%)       | 90                   |                             |                      |
| MEA concentration (wt%)                | 30                   | <b>STRIPPER</b>             |                      |
| Lean CO <sub>2</sub> loading (mol/mol) | 0.13                 | Number of Stripper          | 2                    |
| Rich CO <sub>2</sub> loading (mol/mol) | 0.46                 | Packing                     | SULZER Mellapak 250Y |
|                                        |                      | Calculation type            | Rate-based           |
| <b>ABSORBER</b>                        |                      | Diameter (m)                | 8.38                 |
| Number of Absorber                     | 2                    | Height (m)                  | 29.41                |
| Packing                                | SULZER Mellapak 250Y | Section pressure drop (bar) | 0.019                |
| Calculation type                       | Rate-based           | Reboiler temp. (°C)         | 118.5                |
| Diameter (m)                           | 13.26                | Reboiler Duty (MJ/hr)       | 828000               |
| Height (m)                             | 28.96                | Condenser Duty (MW)         | 5.84                 |
| Section pressure drop (bar)            | 0.054                |                             |                      |
| Lean amine inlet temp (°C)             | 40                   | <b>LEAN AMINE COOLER</b>    |                      |
| Rich amine outlet temp (°C)            | 59                   | Duty (MW)                   | 130.36               |
|                                        |                      |                             |                      |
| <b>CROSS HEATX</b>                     |                      |                             |                      |
| Duty (MW)                              | 114.42               | <b>ELECTROLYZER</b>         |                      |
| Lean amine inlet/outlet temp (°C)      | 118 / 82             | Operating temp. (°C)        | 25                   |
| Rich amine inlet/outlet temp (°C)      | 59 / 97              | Operating press. (bara)     | 1.01325              |

**Table S4.** Summary of main specifications for cCO<sub>2</sub>RR process.

| <b>cCO<sub>2</sub>RR</b>               |                      |                                   |         |
|----------------------------------------|----------------------|-----------------------------------|---------|
| CO <sub>2</sub> capture rate (%)       | 90                   | <b>CROSS HEATX</b>                |         |
| MEA concentration (wt%)                | 30                   | Duty (MW)                         | 46.65   |
| Lean CO <sub>2</sub> loading (mol/mol) | 0.13                 | Lean amine inlet/outlet temp (°C) | 25 / 39 |
| Rich CO <sub>2</sub> loading (mol/mol) | 0.46                 | Rich amine inlet/outlet temp (°C) | 59 / 44 |
|                                        |                      |                                   |         |
| <b>ABSORBER</b>                        |                      |                                   |         |
| Number of Absorber                     | 2                    | <b>ELECTROLYZER</b>               |         |
| Packing                                | SULZER Mellapak 250Y | Operating temp. (°C)              | 25      |
| Calculation type                       | Rate-based           | Operating press. (bara)           | 1.01325 |
| Diameter (m)                           | 13.4                 |                                   |         |
| Height (m)                             | 28.96                |                                   |         |
| Section pressure drop (bar)            | 0.051                |                                   |         |
| Lean amine inlet temp (°C)             | 38                   | <b>RICH AMINE COOLER</b>          |         |
| Rich amine outlet temp (°C)            | 59                   | Duty (MW)                         | 56.67   |

**Table S5.** Pure component properties - Scalar parameter. [4]

| Parameters          | Units  | $MEA H^+$   | $MEACOO^-$  | $CO_2$      | $H_3O^+$     | $HCO_3^-$   |
|---------------------|--------|-------------|-------------|-------------|--------------|-------------|
| DGAQFM <sup>a</sup> | J/kmol | -1.8962e+08 | -4.9299e+08 | -3.8598e+08 | -2.37129e+08 | -5.8677e+08 |
| DHAQFM <sup>b</sup> | J/kmol | -3.3164e+08 | -7.0747e+08 | -4.138e+08  | -2.8583e+08  | -6.9199e+08 |
| DGFORM <sup>c</sup> | J/kmol |             |             | -3.9437e+08 |              |             |
| DHFORM <sup>d</sup> | J/kmol |             |             | -3.9351e+08 |              |             |

| Parameters          | Units  | $OH^-$       | $CO_3^{2-}$ | $MEA$       | $H_2O$       |
|---------------------|--------|--------------|-------------|-------------|--------------|
| DGAQFM              | J/kmol | -1.57244e+08 | -5.2781e+08 |             |              |
| DHAQFM              | J/kmol | -2.29994e+08 | -6.7714e+08 |             |              |
| DGFORM              | J/kmol |              |             | -1.033e+08  | -2.28572e+08 |
| DHFORM              | J/kmol | -1.4351e+08  |             | -2.067e+08  | -2.41818e+08 |
| PCSFTM <sup>e</sup> |        |              |             | 2.9029      | 1.0656       |
| PCSFTU <sup>f</sup> | K      |              |             | 306.2       | 366.51       |
| PCSFTV <sup>g</sup> |        |              |             | 3.1067      | 3.0007       |
| PCSFAU <sup>h</sup> | K      |              |             | 2369        | 2500.7       |
| PCSFAV <sup>i</sup> |        |              |             | 0.01903     | 0.034868     |
| DHVLB <sup>j</sup>  | J/kmol |              |             | 5.02254e+07 |              |

<sup>a</sup> : Aqueous phase free energy of formation at infinite dilution and 25 deg C. For ionic species and molecular solutes in electrolyte systems (DGAQFM)

<sup>b</sup> : Aqueous phase heat of formation at infinite dilution and 25 deg C. For ionic species and molecular solutes in electrolyte systems (DHAQFM)

<sup>c</sup> : Standard free energy of formation for ideal gas at 25 deg C (DGFORM)

<sup>d</sup> : Standard enthalpy of formation for ideal gas at 25 deg C (DHFORM)

<sup>e</sup> : PC-SAFT model parameter - segment number (m)

<sup>f</sup> : PC-SAFT model parameter - segment energy parameter ( $\epsilon/k$ )

<sup>g</sup> : PC-SAFT model parameter - segment diameter ( $\sigma$ )

<sup>h</sup> : PC-SAFT model parameter - association energy ( $\epsilon^{AB}/k$ )

<sup>i</sup> : PC-SAFT model parameter - effective association volume ( $\kappa^{AB}$ )

<sup>j</sup> : Enthalpy of vaporization at TB (DHVLB)

**Table S6.** Parameters for aqueous infinite dilution heat capacity (CPAQ0) [4].

| Component   | Prop.unit | CPAQ0-   | CPAQ0- | CPAQ0- | CPAQ0- | CPAQ0- | CPAQ0- | CPAQ0- | CPAQ0- |
|-------------|-----------|----------|--------|--------|--------|--------|--------|--------|--------|
| $CO_2$      | J/kmol·K  | 132231   | 0      | 0      | 0      | 0      | 0      | 0      | 1000   |
| $H_3O^+$    | J/kmol·K  | 75291    | 0      | 0      | 0      | 0      | 0      | 0      | 2000   |
| $OH^-$      | J/kmol·K  | -148500  | 0      | 0      | 0      | 0      | 0      | 0      | 2000   |
| $MEAH^+$    | J/kmol·K  | 210223   | 0      | 0      | 0      | 0      | 0      | 0      | 1000   |
| $MEACOO^-$  | J/kmol·K  | -0.04978 | 0      | 0      | 0      | 0      | 0      | 0      | 1000   |
| $HCO_3^-$   | J/kmol·K  | -29260   | 0      | 0      | 0      | 0      | 0      | 0      | 2000   |
| $CO_3^{2-}$ | J/kmol·K  | -397100  | 0      | 0      | 0      | 0      | 0      | 0      | 2000   |

**Table S7.** Parameters for dielectric constant (CPDIEC) [5].

| Component | Temp.unit | $A_i$ | $B_i$ | $C_i$  |
|-----------|-----------|-------|-------|--------|
| $MEA$     | K         | 37.72 | 0     | 298.15 |

**Table S8.** Parameters for ideal gas heat capacity (CPIG) [4].

| Component | Temp.uni | Prop.unit | CPIG-1    | CPIG-2     | CPIG-3       | CPIG-4         |
|-----------|----------|-----------|-----------|------------|--------------|----------------|
| $MEA$     | K        | J/kmol·K  | 13207.4   | 281.577    | -0.1513066   | 3.128692e-05   |
| $H_2O$    | K        | J/kmol·K  | 33738.112 | -7.0175634 | 0.027296105  | -1.6646536e-05 |
| $CO_2$    | K        | J/kmol·K  | 19795.19  | 73.436472  | -0.056019384 | 1.715332e-05   |

| CPIG-5        | CPIG-6        | CPIG-7 | CPIG-8 | CPIG-9 | CPIG-10    | CPIG-11   |
|---------------|---------------|--------|--------|--------|------------|-----------|
| 0             | 0             | 283    | 1000   | 33256  | 119.82113  | 1.0636971 |
| 4.2976136e-09 | -4.169608e-13 | 200    | 3000   | 33256  | 1.8978e-20 | 9.2846    |
| 0             | 0             | 300    | 1088.6 | 29099  | 0.71876    | 1.6368    |

**Table S9.** Parameters for Jones-Dole correction to liquid mixture viscosity (IONMOB) [4].

| Component  | Temp.unit | Prop.unit | $l_1$ |
|------------|-----------|-----------|-------|
| $MEAH^+$   | K         | kmol      | 5     |
| $MEACOO^-$ | K         | kmol      | 5     |

**Table S10.** Parameters for Jones-Dole correction to liquid mixture viscosity (IONMUB) [4].

| Component   | Temp.unit | Prop.unit | $b_1$     |
|-------------|-----------|-----------|-----------|
| $MEAH^+$    | K         | cum/kmol  | 0.332352  |
| $MEACOO^-$  | K         | cum/kmol  | 0.168106  |
| $HCO_3^-$   | K         | cum/kmol  | 0.0946944 |
| $CO_3^{2-}$ | K         | cum/kmol  | 0.564118  |

**Table S11.** Parameters for extended antoine vapor pressure for a liquid (PLXANT) [6].

| Component  | Temp.unit | Prop.unit | PLXANT-1 | PLXANT-2 | PLXANT-3 |
|------------|-----------|-----------|----------|----------|----------|
| <i>MEA</i> | °C        | bar       | 161.267  | -13492   | 0        |

| PLXANT-4 | PLXANT-5 | PLXANT-6   | PLXANT-7 | PLXANT-8 | PLXANT-9 |
|----------|----------|------------|----------|----------|----------|
| 0        | -21.914  | 1.3779e-05 | 2        | 9.85     | 364.85   |

**Table S12.** Parameters for brelvi-O-connell volume (VLBROC) [4].

| Component             | Temp.unit | Prop.unit | VLBROC-1 | VLBROC-2  |
|-----------------------|-----------|-----------|----------|-----------|
| <i>CO<sub>2</sub></i> | K         | cum/kmol  | 0.174771 | -0.000338 |
| <i>H<sub>2</sub>O</i> | K         | cum/kmol  | 0.0464   | 0         |

**Table S13.** Parameters for henry's constant (HENRY) [4, 7]

| Component             | Component             | Tem | Prop  | $a_{iA}$ | $b_{iA}$ | $c_{iA}$ | $d_{iA}$   | $T_L$  | $T_H$  |
|-----------------------|-----------------------|-----|-------|----------|----------|----------|------------|--------|--------|
| <i>CO<sub>2</sub></i> | <i>H<sub>2</sub>O</i> | K   | N/sqm | 100.65   | -6147.7  | -10.191  | -0.01      | 273.15 | 473.15 |
| <i>N<sub>2</sub></i>  | <i>H<sub>2</sub>O</i> | K   | N/sqm | 176.507  | -8432.8  | -21.558  | -0.0084362 | 273    | 346    |
| <i>O<sub>2</sub></i>  | <i>H<sub>2</sub>O</i> | K   | N/sqm | 155.921  | -7775.1  | 18.3974  | -0.0094435 | 274    | 348    |
| <i>H<sub>2</sub></i>  | <i>H<sub>2</sub>O</i> | K   | N/sqm | 191.579  | -6993.5  | -26.312  | 0.0150431  | 274    | 339    |
| <i>CO<sub>2</sub></i> | <i>MEA</i>            | K   | N/sqm | 20.3143  | -896.5   | 0        | 0          | 0      | 2000   |
| <i>AR</i>             | <i>H<sub>2</sub>O</i> | K   | N/sqm | 180.991  | -8137.1  | -23.255  | 0.00306357 | 274    | 347    |
| <i>CO</i>             | <i>H<sub>2</sub>O</i> | K   | N/sqm | 183.288  | -8296.8  | -23.337  | 0          | 273    | 353    |

**Table S14.** Parameters for NRTL [5, 7]

| Component             | Component             | Temp | $a_{ij}$ | $a_{ji}$ | $b_{ij}$ | $b_{ji}$ | $c_{ij}$ | $T_L$  | $T_H$   |
|-----------------------|-----------------------|------|----------|----------|----------|----------|----------|--------|---------|
| <i>H<sub>2</sub>O</i> | <i>MEA</i>            | K    | 0.1559   | 1.5201   | 110.8    | -910.3   | 0.3      | 273.15 | 1273.15 |
| <i>CO<sub>2</sub></i> | <i>H<sub>2</sub>O</i> | K    | 0        | 0        | 0        | 0        | 0.2      | 0      | 1000    |

**Table S15.** Parameters for liquid mixture viscosity (MUKIJ) [4].

| Component  | Component             | Temp | $a_{ij}$ | $b_{ij}$ | $c_{ij}$ | $d_{ij}$ | $e_{ij}$ | $T_{ref}$ |
|------------|-----------------------|------|----------|----------|----------|----------|----------|-----------|
| <i>MEA</i> | <i>H<sub>2</sub>O</i> | K    | 0.704111 | 0        | 0        | 0        | 0        | 298.15    |

**Table S16.** Parameters for liquid mixture viscosity (MULIJ) [4].

| Component<br>i | Component<br>j        | Temp<br>Units | $a_{ij}$ | $a_{ji}$ | $b_{ij}$ | $b_{ji}$ | $c_{ij}$ | $c_{ji}$ | $d_{ij}$ | $d_{ji}$ | $e_{ij}$ | $e_{ji}$ | $T_{ref}$ |
|----------------|-----------------------|---------------|----------|----------|----------|----------|----------|----------|----------|----------|----------|----------|-----------|
| <i>MEA</i>     | <i>H<sub>2</sub>O</i> | K             | -1.7418  | 1.7418   | 0        | 0        | 0        | 0        | 0        | 0        | 0        | 0        | 298.15    |

**Table S17.** Parameters for clarke aqueous electrolyte volume (VLCLK) [4].

| Component<br>i | Component<br>j | Prop<br>Units | $V_{ca}^{\infty}$ | $A_{ca}$ |
|----------------|----------------|---------------|-------------------|----------|
| $MEAH^+$       | $OH^-$         | cum/kmol      | 0                 | 0        |
| $MEAH^+$       | $HCO_3^-$      | cum/kmol      | 0.0712212         | 0        |
| $MEAH^+$       | $MEACOO^-$     | cum/kmol      | 0.122196          | 0        |
| $MEAH^+$       | $CO_3^{2-}$    | cum/kmol      | 0.0997818         | 0        |



**Table S18.** Global economic assumptions [8].

| Global Economic Assumptions             |                                                      |
|-----------------------------------------|------------------------------------------------------|
| Discounted Rate                         | 10%                                                  |
| Income Tax Rate                         | 34% Federal, 6% State (Effective tax rate: 38%)      |
| Capital Depreciation Type               | MACRS (7 years)                                      |
| Investment Tax Credit                   | 0%                                                   |
| Tax Holiday                             | 0 years                                              |
| Capital Expenditure Period              | Coal Plant: 5 years                                  |
| Operational Period                      | 30 years                                             |
| Economic Analysis Period                | 35 years                                             |
| Distribution of Total Overnight Capital | 5-year period: 10%, 30%, 25%, 20%, 15%               |
| Cash Reserves                           | 8.33% of Annual cost of manufacture                  |
| Inventory                               | 1.92% of Annual sales of liquid /solid product       |
| Accounts Receivable                     | 8.33% of Annual sales of all products                |
| Accounts Payable                        | 8.33% of Annual feedstock cost                       |
| Start Up Capacity                       | 1 <sup>st</sup> year: 50%, 2 <sup>nd</sup> year: 75% |
| Year of cost data                       | 2021                                                 |

**Table S19.** Electrolyzer parameters adopted from the DOE H<sub>2</sub>A project for capital cost calculation [3].

| Parameter                                                                                            | Value         |
|------------------------------------------------------------------------------------------------------|---------------|
| Reference PEM electrolyzer for H <sub>2</sub> production                                             | 50,000 kg/day |
| Reference PEM electrolyzer total uninstalled capital<br>: Future central (2016\$ k W <sup>-1</sup> ) | \$233         |
| Reference PEM electrolyzer stack current density (mA cm <sup>-2</sup> )                              | 3000          |
| Reference PEM electrolyzer cell voltage (V)                                                          | 1.8           |
| Maintenance cost (% of capital per year) [12]                                                        | 2.5           |
| Cell compartment replacement cost (% of capital cost, every 7 year) [13]                             | 15            |
| MEA replacement cost (% of stack cost) [14]                                                          | 5             |
| Installation factor (% of uninstalled capital cost) [12]                                             | 12            |
| Reference PEM electrolyzer purchase cost (\$ m <sup>-2</sup> )                                       | 12,582        |
| Reference PEM electrolyzer installed cost (\$ m <sup>-2</sup> )                                      | 14,092        |

**Table S20.** Electrolyzer capital cost calculation.

| Parameter                                                         | Value         |
|-------------------------------------------------------------------|---------------|
| Product production rate (kg/day)                                  | 3238168       |
| Required partial current (A)                                      | 258190273     |
| Required total current (A)                                        | 260798256     |
| Required electrolyzer area (m <sup>2</sup> )                      | 130399        |
| Required power (MW)                                               | 597           |
| Reference PEM electrolyzer purchase cost (\$/m <sup>2</sup> ) [3] | 12582         |
| Calculated electrolyzer cost (\$) [12]                            | 1,640,681,832 |
| Calculated electrolyzer stack cost (\$, 65% of total cost) [12]   | 1,066,443,191 |
| Calculated electrolyzer BoP cost (\$, 35% of total cost) [12]     | 883,444,063   |
| Calculated electricity cost (\$/year)                             | 222,347,987   |

**Table S21.** Materials & utilities unit prices.

|                            | <b>Parameter</b>                             | <b>Value</b> |
|----------------------------|----------------------------------------------|--------------|
| Utility cost [9]           | Steam, 450 psig (\$/kg)                      | 0.0176       |
|                            | Steam, 150 psig (\$/kg)                      | 0.0153       |
|                            | Steam, 50 psig (\$/kg)                       | 0.0132       |
|                            | Electricity (\$/kWh)                         | 0.05         |
|                            | Cooling water (\$/m <sup>3</sup> )           | 0.027        |
|                            | Process water (\$/m <sup>3</sup> )           | 0.27         |
|                            | Boiler-feed water (\$/m <sup>3</sup> )       | 0.56         |
|                            | Refrigeration - 150F (\$/GJ)                 | 33.2         |
|                            | Refrigeration - 90F (\$/GJ)                  | 23.3         |
|                            | Refrigeration - 30F (\$/GJ)                  | 13.17        |
|                            | Refrigeration, 10F (\$/GJ)                   | 6.47         |
| Chilled water, 40F (\$/GJ) | 5                                            |              |
| Material cost              | Water (\$/1000 gallons) [1]                  | 1.08         |
|                            | MU & WT Chem (\$/lbs) [1]                    | 0.17         |
|                            | Limestone (\$/ton) [1]                       | 21.63        |
|                            | Carbon (Mercury Removal) (\$/lb) [1]         | 1.05         |
|                            | MEA solvent (\$/ton) [1]                     | 2249.89      |
|                            | NaOH (\$/tons) [1]                           | 433.68       |
|                            | H <sub>2</sub> SO <sub>4</sub> (\$/tons) [1] | 138.78       |
|                            | Activated carbon (\$/lb) [1]                 | 1.05         |
|                            | Ammonia (19% NH <sub>3</sub> ) (\$/ton) [1]  | 129.8        |
|                            | KCl (\$/kg) [15]                             | 0.8          |
|                            | KOH (\$/kg) [16]                             | 0.244        |
| Fuel (\$/ton) [1]          | 38.18                                        |              |
| Product market price       | CO (\$/kg) [13]                              | 0.8          |
|                            | Hydrogen (\$/kg) [17]                        | 1.39         |

**Table S22.** Life cycle assessment assumptions.

|                   |                                                         |
|-------------------|---------------------------------------------------------|
| Software          | Simapro (Version 9.3, Pre-consultants, the Netherlands) |
| System boundary   | Gate-to-gate                                            |
| Data library      | Ecoinvent v3.8                                          |
| Assessment method | ReCiPe 2016 (H) v1.1                                    |
| Functional unit   | 1.0 kg of CO                                            |

**Table S23.** Life cycle inventory obtained from Ecoinvent v3.8 [18] (Software: Simapro v9.3).

| Materials           | Name of data set                                                                                           | Database       |
|---------------------|------------------------------------------------------------------------------------------------------------|----------------|
| Water               | Water, process and cooling, unspecified natural origin                                                     | Ecoinvent v3.8 |
| Water               | Water, cooling, salt, ocean                                                                                | Ecoinvent v3.8 |
| Nitrogen            | Nitrogen, atmospheric                                                                                      | Ecoinvent v3.8 |
| Oxygen              | Oxygen                                                                                                     | Ecoinvent v3.8 |
| Argon               | Argon                                                                                                      | Ecoinvent v3.8 |
| Monoethanolamine    | Monoethanolamine   market for   APOS, S                                                                    | Ecoinvent v3.8 |
| Potassium hydroxide | Potassium hydroxide [GLO]  market for   APOS, S                                                            | Ecoinvent v3.8 |
| Carbon dioxide      | Carbon dioxide, in chemical industry [GLO]  market for carbon dioxide, in chemical industry   APOS, S      | Ecoinvent v3.8 |
| Steam               | Heat, from steam, in chemical industry [RER]  market for heat, from steam, in chemical industry   APOS, S  | Ecoinvent v3.8 |
| Electricity         | Electricity, high voltage [RoW]  electricity production, wind, >3MW turbine, onshore   APOS, S             | Ecoinvent v3.8 |
| Electricity         | Electricity, high voltage [RoW]  electricity production, natural gas, combined cycle power plant   APOS, S | Ecoinvent v3.8 |
| Electricity         | Electricity, high voltage [RoW]  heat and power co-generation, biogas, gas engine   APOS, S                | Ecoinvent v3.8 |
| Electricity         | Electricity, high voltage [RoW]  treatment of coal gas, in power plant   APOS, S                           | Ecoinvent v3.8 |
| Electricity         | Electricity, high voltage [RoW]  electricity production, hydro, run-of-river   APOS, S                     | Ecoinvent v3.8 |
| Electricity         | Electricity, high voltage [RoW]  electricity production, nuclear, pressure water reactor   APOS, S         | Ecoinvent v3.8 |
| Electricity         | Electricity, high voltage [RoW]  heat and power co-generation, hard coal   APOS, S                         | Ecoinvent v3.8 |
| Electricity         | Electricity, high voltage [RoW]  electricity production, solar thermal parabolic trough, 50 MW   APOS, S   | Ecoinvent v3.8 |

**Table S24.** Characterization result of impact categories for cCO<sub>2</sub>RR process in current case.

| Impact category               | Unit                  | Total    | Direct emissions |          | Indirect emission  |                     |                        |
|-------------------------------|-----------------------|----------|------------------|----------|--------------------|---------------------|------------------------|
|                               |                       |          |                  | MEA      | Potassium chloride | Potassium hydroxide | Electricity (Coal gas) |
| Global warming                | kg CO <sub>2</sub> eq | 3.80E+00 | 1.75E-01         | 1.35E-03 | 9.74E-05           | 6.34E-03            | 3.62E+00               |
| Ozone formation, Human health | kg NO <sub>x</sub> eq | 2.39E-03 | 0                | 2.33E-06 | 2.81E-07           | 1.71E-05            | 2.38E-03               |
| Terrestrial acidification     | kg SO <sub>2</sub> eq | 1.09E-03 | 0                | 3.78E-06 | 3.70E-07           | 2.46E-05            | 1.06E-03               |
| Freshwater eutrophication     | kg P eq               | 4.14E-05 | 0                | 4.10E-07 | 3.46E-08           | 2.88E-06            | 3.81E-05               |
| Marine ecotoxicity            | kg 1,4-DCB            | 6.80E-03 | 4.38E-06         | 5.31E-05 | 4.19E-06           | 4.75E-04            | 6.26E-03               |
| Human carcinogenic toxicity   | kg 1,4-DCB            | 2.19E-02 | 0                | 5.69E-05 | 4.06E-06           | 4.31E-04            | 2.14E-02               |
| Fossil resource scarcity      | kg oil eq             | 1.55E+00 | 0                | 6.11E-04 | 2.26E-05           | 1.73E-03            | 1.55E+00               |
| Water consumption             | m <sup>3</sup>        | 7.52E-03 | 8.55E-04         | 2.05E-05 | 8.25E-07           | 6.16E-05            | 6.58E-03               |

**Table S25.** Characterization result of impact categories for cCO<sub>2</sub>RR process in optimistic case.

| Impact category               | Unit                  | Total    | Direct emissions |          | Indirect emission  |                     |                        |
|-------------------------------|-----------------------|----------|------------------|----------|--------------------|---------------------|------------------------|
|                               |                       |          |                  | MEA      | Potassium chloride | Potassium hydroxide | Electricity (Coal gas) |
| Global warming                | kg CO <sub>2</sub> eq | 2.86E+00 | 1.75E-01         | 1.35E-03 | 9.74E-05           | 6.34E-03            | 2.68E+00               |
| Ozone formation, Human health | kg NO <sub>x</sub> eq | 1.78E-03 | 0                | 2.33E-06 | 2.81E-07           | 1.71E-05            | 1.76E-03               |
| Terrestrial acidification     | kg SO <sub>2</sub> eq | 7.95E-04 | 0                | 3.78E-06 | 3.70E-07           | 2.46E-05            | 7.67E-04               |
| Freshwater eutrophication     | kg P eq               | 2.89E-05 | 0                | 4.10E-07 | 3.46E-08           | 2.88E-06            | 2.56E-05               |
| Marine ecotoxicity            | kg 1,4-DCB            | 4.75E-03 | 4.38E-06         | 5.31E-05 | 4.19E-06           | 4.75E-04            | 4.21E-03               |
| Human carcinogenic toxicity   | kg 1,4-DCB            | 1.60E-02 | 0                | 5.69E-05 | 4.06E-06           | 4.31E-04            | 1.55E-02               |
| Fossil resource scarcity      | kg oil eq             | 1.15E+00 | 0                | 6.11E-04 | 2.26E-05           | 1.73E-03            | 1.14E+00               |
| Water consumption             | m <sup>3</sup>        | 5.81E-03 | 8.55E-04         | 2.05E-05 | 8.25E-07           | 6.16E-05            | 4.87E-03               |

**Table S26.** Characterization result of impact categories for CO<sub>2</sub>RR process.

| Impact category               | Unit                  | Total    | Direct emissions |                     | Indirect emission      |          |
|-------------------------------|-----------------------|----------|------------------|---------------------|------------------------|----------|
|                               |                       |          | MEA              | Potassium hydroxide | Electricity (Coal gas) |          |
| Global warming                | kg CO <sub>2</sub> eq | 2.99E+00 | 1.76E-01         | 1.19E-03            | 9.27E-05               | 2.81E+00 |
| Ozone formation, Human health | kg NO <sub>x</sub> eq | 1.85E-03 | 0                | 2.04E-06            | 2.49E-07               | 1.85E-03 |
| Terrestrial acidification     | kg SO <sub>2</sub> eq | 8.25E-04 | 0                | 3.32E-06            | 3.59E-07               | 8.21E-04 |
| Freshwater eutrophication     | kg P eq               | 3.00E-05 | 0                | 3.59E-07            | 4.21E-08               | 2.96E-05 |
| Marine ecotoxicity            | kg 1,4-DCB            | 4.92E-03 | 3.83E-06         | 4.65E-05            | 6.94E-06               | 4.87E-03 |
| Human carcinogenic toxicity   | kg 1,4-DCB            | 1.67E-02 | 0                | 4.99E-05            | 6.29E-06               | 1.66E-02 |
| Fossil resource scarcity      | kg oil eq             | 1.20E+00 | 0                | 5.35E-04            | 2.53E-05               | 1.20E+00 |
| Water consumption             | m <sup>3</sup>        | 6.07E-03 | 9.36E-04         | 1.80E-05            | 9.00E-07               | 5.12E-03 |

**Table S27.** Normalization result of impact categories for cCO<sub>2</sub>RR process in current case.

| Impact category               | Total    | Direct emissions | Indirect emission |                    |                     |                        |
|-------------------------------|----------|------------------|-------------------|--------------------|---------------------|------------------------|
|                               |          |                  | MEA               | Potassium chloride | Potassium hydroxide | Electricity (Coal gas) |
| Global warming                | 4.75E-04 | 2.18E-05         | 1.69E-07          | 1.22E-08           | 7.93E-07            | 4.53E-04               |
| Ozone formation, Human health | 1.16E-04 | 0                | 1.13E-07          | 1.37E-08           | 8.29E-07            | 1.15E-04               |
| Terrestrial acidification     | 2.65E-05 | 0                | 9.23E-08          | 9.03E-09           | 5.99E-07            | 2.58E-05               |
| Freshwater eutrophication     | 6.37E-05 | 0                | 6.31E-07          | 5.33E-08           | 4.44E-06            | 5.86E-05               |
| Marine ecotoxicity            | 1.56E-04 | 1.01E-07         | 1.22E-06          | 9.64E-08           | 1.09E-05            | 1.44E-04               |
| Human carcinogenic toxicity   | 2.12E-03 | 0                | 5.53E-06          | 3.95E-07           | 4.18E-05            | 2.08E-03               |
| Fossil resource scarcity      | 1.58E-03 | 0                | 6.23E-07          | 2.30E-08           | 1.77E-06            | 1.58E-03               |
| Water consumption             | 2.82E-05 | 3.20E-06         | 7.69E-08          | 3.09E-09           | 2.31E-07            | 2.47E-05               |

**Table S28.** Normalization result of impact categories for cCO<sub>2</sub>RR process in optimistic case.

| Impact category               | Total    | Direct emissions | Indirect emission |                    |                     |                        |
|-------------------------------|----------|------------------|-------------------|--------------------|---------------------|------------------------|
|                               |          |                  | MEA               | Potassium chloride | Potassium hydroxide | Electricity (Coal gas) |
| Global warming                | 3.58E-04 | 2.18E-05         | 1.69E-07          | 1.22E-08           | 7.93E-07            | 3.35E-04               |
| Ozone formation, Human health | 8.64E-05 | 0                | 1.13E-07          | 1.37E-08           | 8.29E-07            | 8.54E-05               |
| Terrestrial acidification     | 1.98E-05 | 0                | 9.23E-08          | 9.03E-09           | 5.99E-07            | 1.91E-05               |
| Freshwater eutrophication     | 4.85E-05 | 0                | 6.31E-07          | 5.33E-08           | 4.44E-06            | 4.34E-05               |
| Marine ecotoxicity            | 1.19E-04 | 1.01E-07         | 1.22E-06          | 9.64E-08           | 1.09E-05            | 1.07E-04               |
| Human carcinogenic toxicity   | 1.58E-03 | 0                | 5.53E-06          | 3.95E-07           | 4.18E-05            | 1.54E-03               |
| Fossil resource scarcity      | 1.17E-03 | 0                | 6.23E-07          | 2.30E-08           | 1.77E-06            | 1.17E-03               |
| Water consumption             | 2.18E-05 | 3.20E-06         | 7.69E-08          | 3.09E-09           | 2.31E-07            | 1.83E-05               |

**Table S29.** Normalization result of impact categories for CO<sub>2</sub>RR process.

| Impact category               | Total    | Direct emissions | Indirect emission |                     |                        |
|-------------------------------|----------|------------------|-------------------|---------------------|------------------------|
|                               |          |                  | MEA               | Potassium hydroxide | Electricity (Coal gas) |
| Global warming                | 3.74E-04 | 2.20E-05         | 1.48E-07          | 1.16E-08            | 3.52E-04               |
| Ozone formation, Human health | 8.98E-05 | 0                | 9.91E-08          | 1.21E-08            | 8.97E-05               |
| Terrestrial acidification     | 2.01E-05 | 0                | 8.09E-08          | 8.76E-09            | 2.00E-05               |
| Freshwater eutrophication     | 4.62E-05 | 0                | 5.53E-07          | 6.48E-08            | 4.56E-05               |
| Marine ecotoxicity            | 1.13E-04 | 8.81E-08         | 1.07E-06          | 1.60E-07            | 1.12E-04               |
| Human carcinogenic toxicity   | 1.62E-03 | 0                | 4.84E-06          | 6.11E-07            | 1.61E-03               |
| Fossil resource scarcity      | 1.23E-03 | 0                | 5.46E-07          | 2.58E-08            | 1.23E-03               |
| Water consumption             | 2.28E-05 | 3.51E-06         | 6.74E-08          | 3.37E-09            | 1.92E-05               |

**Table S30.** Environmental impacts of various electricity sources.

| Electricity source | Global warming impact         |                                  |                    |
|--------------------|-------------------------------|----------------------------------|--------------------|
|                    | cCO <sub>2</sub> RR (Current) | cCO <sub>2</sub> RR (Optimistic) | CO <sub>2</sub> RR |
| Coal gas           | 3.803                         | 2.861                            | 2.991              |
| Natural gas        | 5.086                         | 3.833                            | 4.012              |
| Hard coal          | 10.341                        | 7.721                            | 8.097              |
| Wind               | 0.456                         | 0.407                            | 0.413              |
| Nuclear            | 0.206                         | 0.222                            | 0.219              |
| Hydro              | 0.189                         | 0.210                            | 0.206              |
| Solar              | 0.574                         | 0.495                            | 0.505              |
| Biogas             | 1.843                         | 1.433                            | 1.491              |



## Supplementary figures

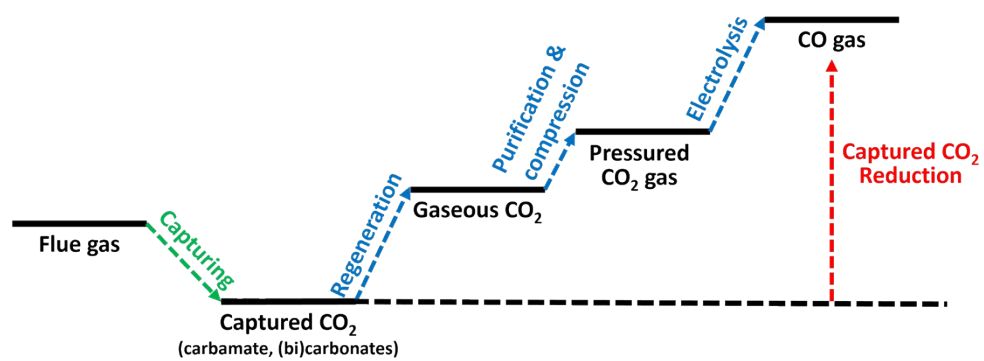

**Fig. S1.** Energy diagram between gaseous CO<sub>2</sub> and carbamate reduction reactions.

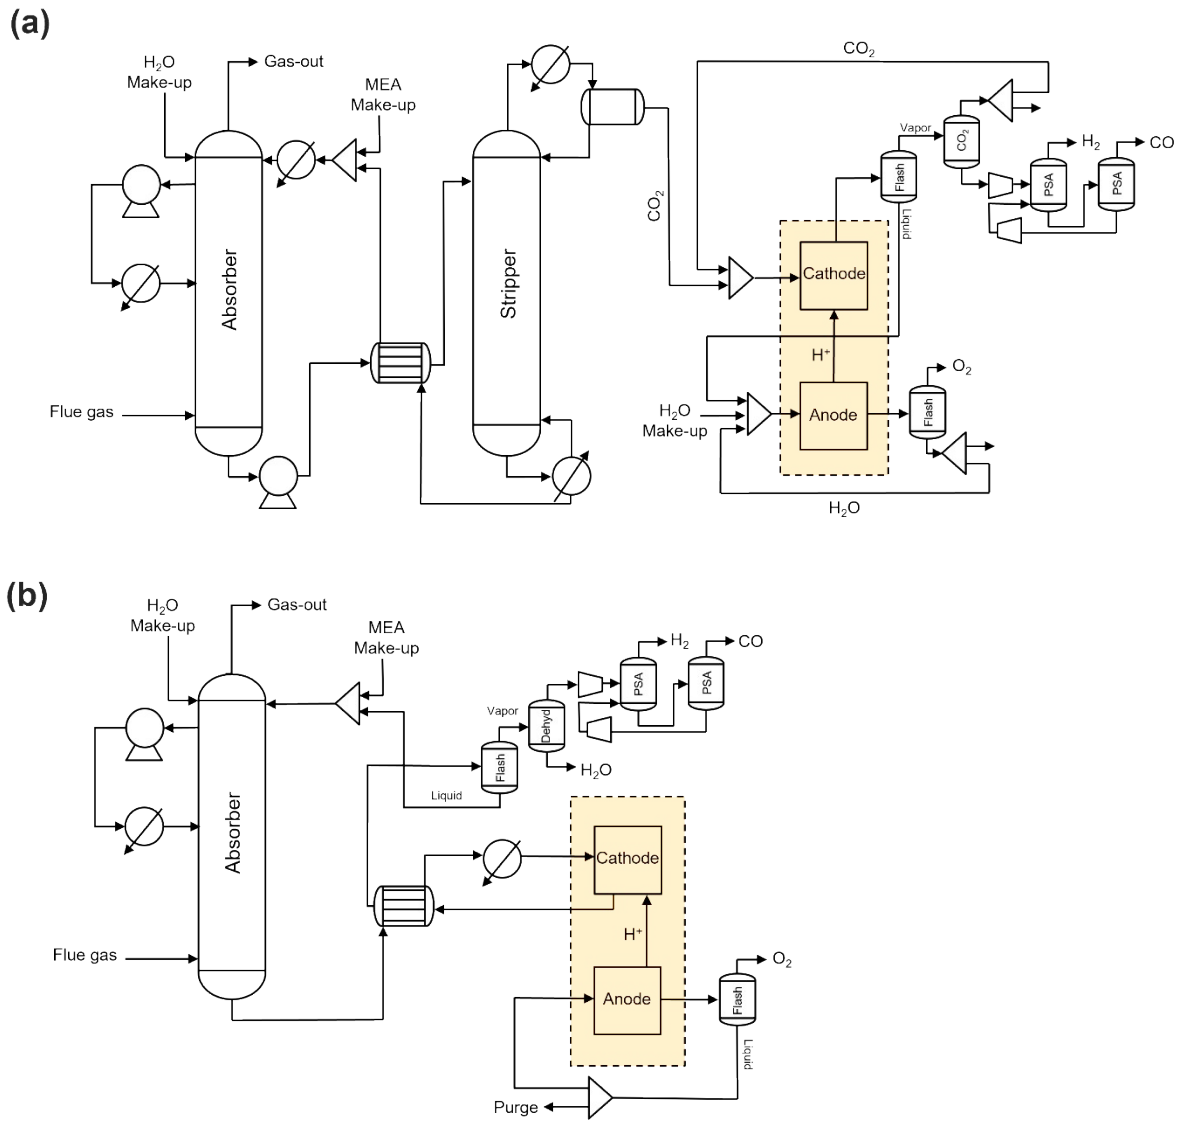

**Fig. S2.** PFD of two CCU technology (a) CO<sub>2</sub>RR process and (b) cCO<sub>2</sub>RR process.

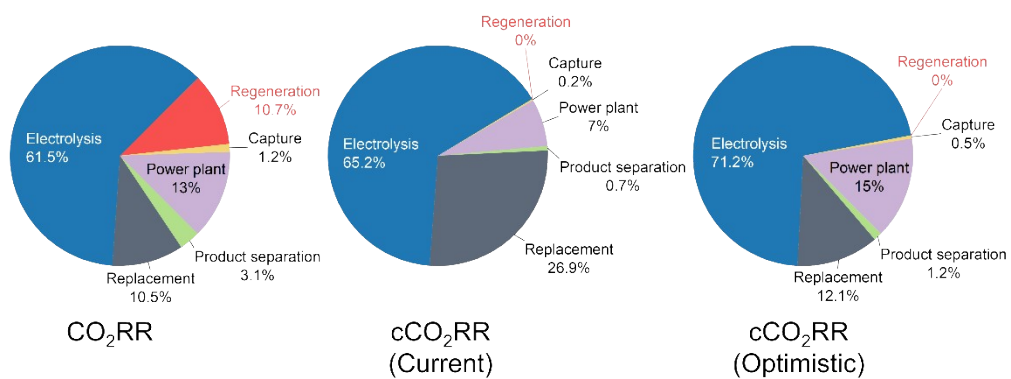

**Fig. S3.** Pie chart showing the percentage of annual operating cost by unit process under different electrochemical performances scenarios.

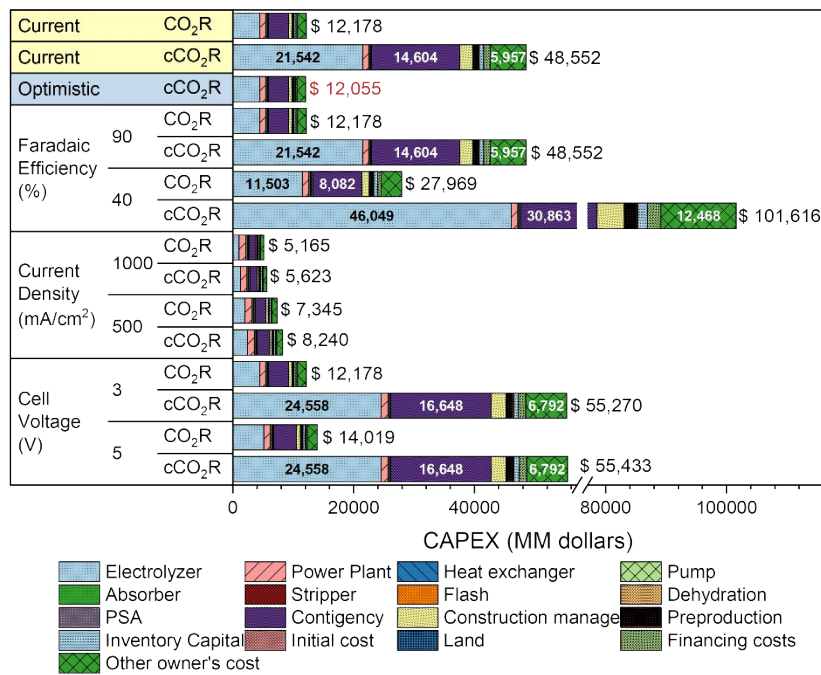

**Fig. S4.** Comparison of the total capital cost (CAPEX) breakdown of the cCO<sub>2</sub>RR and CO<sub>2</sub>RR processes under different electrochemical performances scenarios (current level, optimistic level, FE, current density, and overpotential).

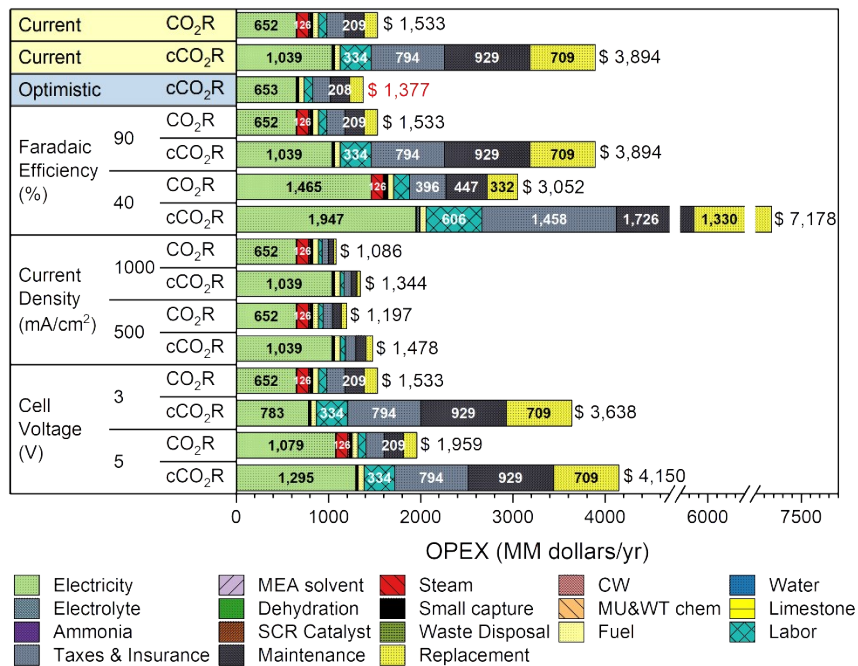

**Fig. S5.** Comparison of the total operating cost (OPEX) breakdown of the cCO<sub>2</sub>RR and CO<sub>2</sub>RR processes under different electrochemical performances scenarios (current level, optimistic level, FE, current density, and overpotential).

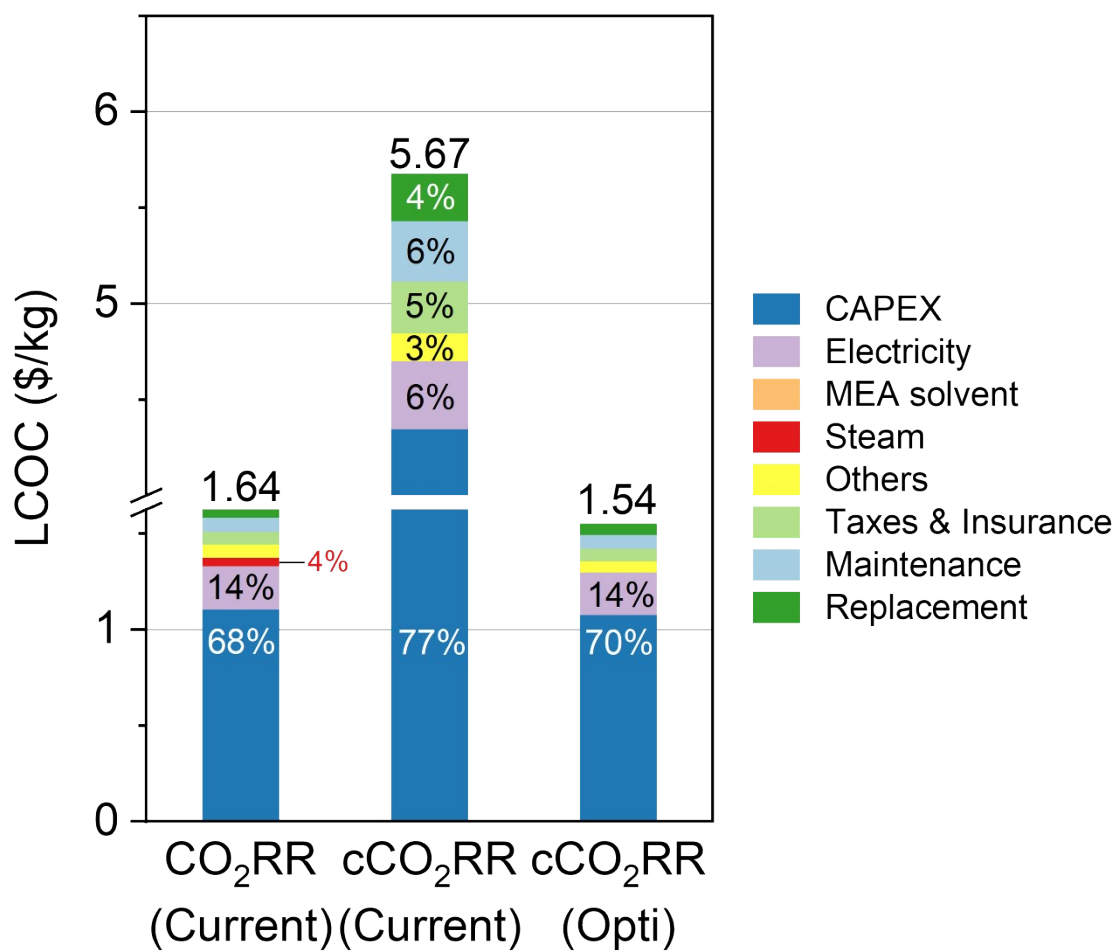

**Fig. S6.** Cost breakdown based on LCOC of both CCU processes under different electrochemical performances scenarios.

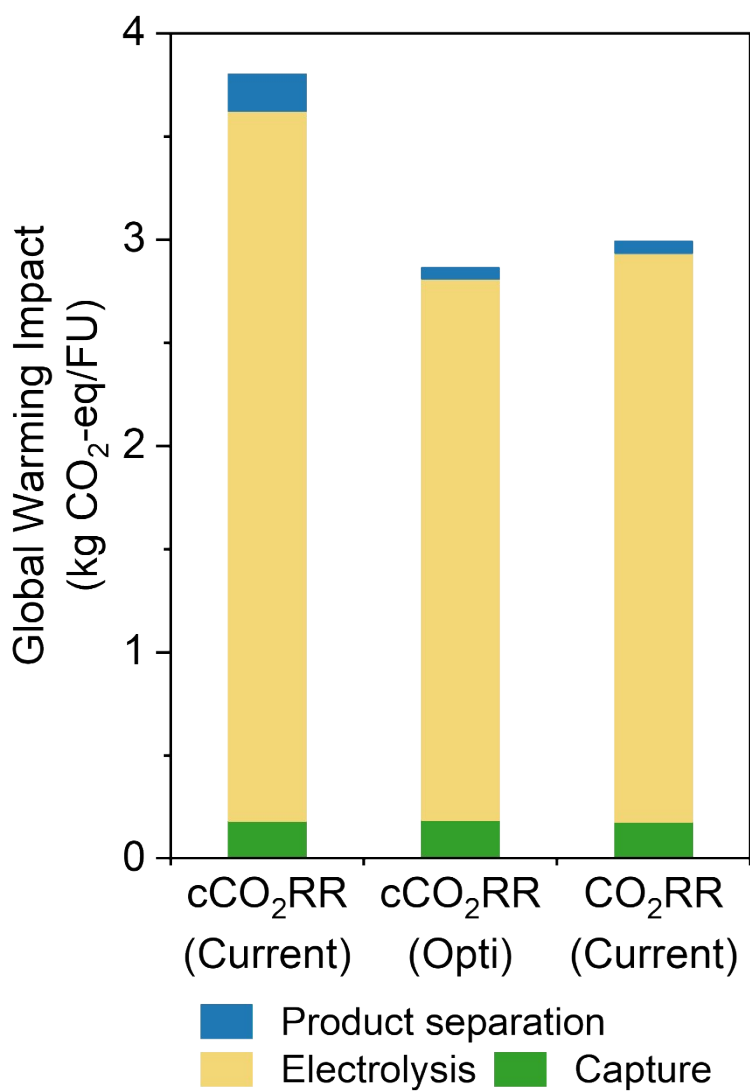

**Fig. S7.** Comparison of the global warming impact (GWI) according to unit processes.

1. Haslback, J., et al., *Cost and Performance Baseline for Fossil Energy Plants, Volume 1: Bituminous Coal and Natural Gas to Electricity, Revision 2a*. 2013, National Energy Technology Laboratory (NETL), Pittsburgh, PA, Morgantown, WV ....
2. Lin, Y.-J., E. Chen, and G.T. Rochelle, *Pilot plant test of the advanced flash stripper for CO<sub>2</sub> capture*. Faraday discussions, 2016. **192**: p. 37-58.
3. Peterson, D., J. Vickers, and D. DeSantis, *Hydrogen production cost from PEM electrolysis-2019*. DOE Hydrogen Fuel Cells Program Record, 2020. **19009**.
4. Plus, A., *Aspen physical property system V7. 2*. 2010.
5. Zhang, Y., H. Que, and C.-C. Chen, *Thermodynamic modeling for CO<sub>2</sub> absorption in aqueous MEA solution with electrolyte NRTL model*. Fluid Phase Equilibria, 2011. **311**: p. 67-75.
6. Hilliard, M.D., *A predictive thermodynamic model for an aqueous blend of potassium carbonate, piperazine, and monoethanolamine for carbon dioxide capture from flue gas*. 2008.
7. Yan, Y. and C.-C. Chen, *Thermodynamic modeling of CO<sub>2</sub> solubility in aqueous solutions of NaCl and Na<sub>2</sub>SO<sub>4</sub>*. The Journal of Supercritical Fluids, 2010. **55**(2): p. 623-634.
8. Theis, J., *Quality Guidelines for Energy Systems Studies: Cost Estimation Methodology for NETL Assessments of Power Plant Performance-Feb 2021*. 2021, National Energy Technology Laboratory (NETL), Pittsburgh, PA, Morgantown, WV ....
9. Seider, W.D., J.D. Seader, and D.R. Lewin, *PRODUCT & PROCESS DESIGN PRINCIPLES: SYNTHESIS, ANALYSIS AND EVALUATION, (With CD)*. 2009: John Wiley & Sons.
10. Junsittiwate, R., T.R. Srinophakun, and S. Sukpancharoen, *Techno-economic, environmental, and heat integration of palm empty fruit bunch upgrading for power generation*. Energy for Sustainable Development, 2022. **66**: p. 140-150.
11. Agbonghae, E., et al., *Optimal process design of commercial-scale amine-based CO<sub>2</sub> capture plants*. Industrial & Engineering Chemistry Research, 2014. **53**(38): p. 14815-14829.
12. Jouny, M., W. Luc, and F. Jiao, *General techno-economic analysis of CO<sub>2</sub> electrolysis systems*. Industrial & Engineering Chemistry Research, 2018. **57**(6): p. 2165-2177.
13. Shin, H., K.U. Hansen, and F. Jiao, *Techno-economic assessment of low-temperature carbon dioxide electrolysis*. Nature Sustainability, 2021. **4**(10): p. 911-919.
14. Bertuccioli, L., et al., *Development of water electrolysis in the European Union*. 2014.
15. Sachde, D.J., *Uranium extraction from seawater: an assessment of cost, uncertainty and policy implications*. 2011.
16. Fernandez, L. *Potassium chloride price development 2015-2035 [Chart]*. 2022, March; Available from: <https://www.statista.com/statistics/469705/potassium-chloride-price-forecast/>.
17. Shaner, M.R., et al., *A comparative technoeconomic analysis of renewable hydrogen production using solar energy*. Energy & Environmental Science, 2016. **9**(7): p. 2354-2371.
18. Wernet, G., et al., *The ecoinvent database version 3 (part I): overview and methodology*. The International Journal of Life Cycle Assessment, 2016. **21**(9): p. 1218-1230.
